# Supplementary material
Source: Springer Nature journal article supplement (https://www.springermedizin.de/resource/supplementary/12889_2010_2687_MOESM1_ESM.pdf/9487068)
Supplement: MOESM1 [file 9487068]

| Condensed Meaning units                                                                                                                            | Codes                                                                                      | Sub-categories                   | Categories    |
|----------------------------------------------------------------------------------------------------------------------------------------------------|--------------------------------------------------------------------------------------------|----------------------------------|---------------|
| G3: Smoking was "me" from the start, it wasn't a question if ... but when I would start.<br>G2: Yes, you felt as a smoker, just hadn't started.    | Smoking was me, not if but when, felt like a smoker, not just started                      | Internalized norms and values    | Normalization |
| G1: Out of ten things I associate with mum smoking is one of them, positively like a perfume, for me too.<br>G2: And it is not like that with dad. | Positive association, it's mum, as perfume, positive identification, it's me too           | Identification with adults       |               |
| B1: I sit at the balcony with mum and smoke.<br>B4: ... her cigarettes...                                                                          | Smoke with mum, smoke mums cigarettes, access from parent, lose temper parental acceptance | Adults acceptance and permission |               |
| B1: If I don't have fags or money I get from mum.<br>B3: Yeah, because she knows that you lose your temper otherwise                               |                                                                                            |                                  |               |
| G4: Everybody smokes!<br>G1: Yes, they do. At least that's what you think... but they do.                                                          | Everybody smokes, at least that's what you think, peer influence                           | Peer pressure                    |               |
